# Supplementary material for: An in situ polymerization approach for functionalized MoS2/nylon-6 nanocomposites with enhanced mechanical properties and thermal stability
Source: Royal Society of Chemistry journal article supplement (doi:10.1039/c5ta06071k), 2015-01-01
Supplement: c5ta06071k1.pdf [file c5ta06071k1.pdf]

**Supporting Information for**

*In situ* polymerization approach to  
MoS<sub>2</sub>/nylon-6 nanocomposites with enhanced  
mechanical properties and thermal stability

*Xin Wang, Ehsan Naderi Kalali and De-Yi Wang\**

IMDEA Materials Institute, C/Eric Kandel, 2, Getafe 28906, Madrid, Spain

*E-mail Address:* [deyi.wang@imdea.org](mailto:deyi.wang@imdea.org)

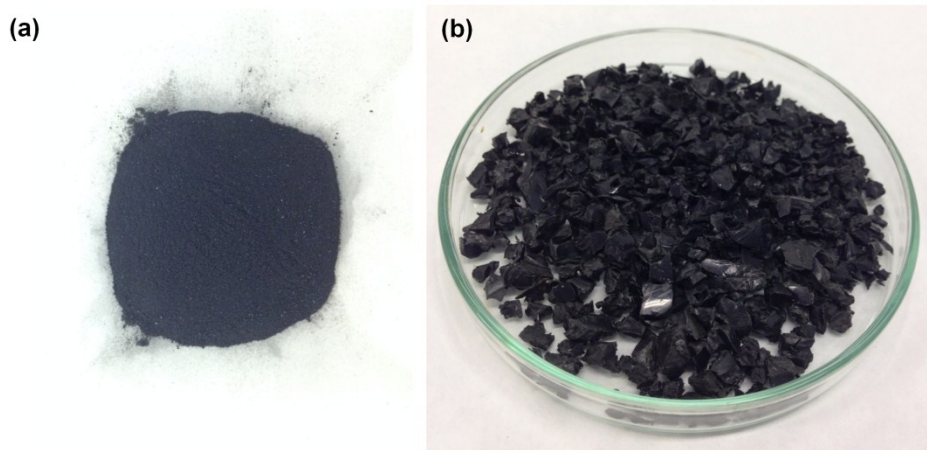

**Fig. S1.** Digital photos of f-MoS<sub>2</sub> powder (a) and the pieces of chopped f-MoS<sub>2</sub>/PA6-0.5 nanocomposites (b).

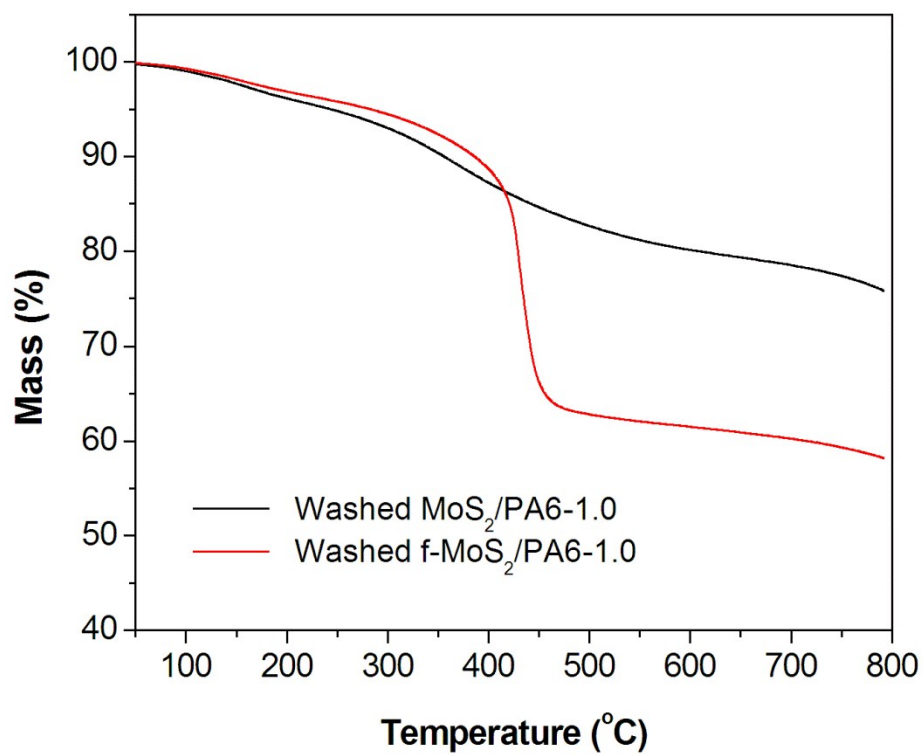

**Fig. S2.** TGA profiles of MoS<sub>2</sub>/PA6-1.0 and f-MoS<sub>2</sub>/PA6-1.0 nanocomposites washed by formic acid.

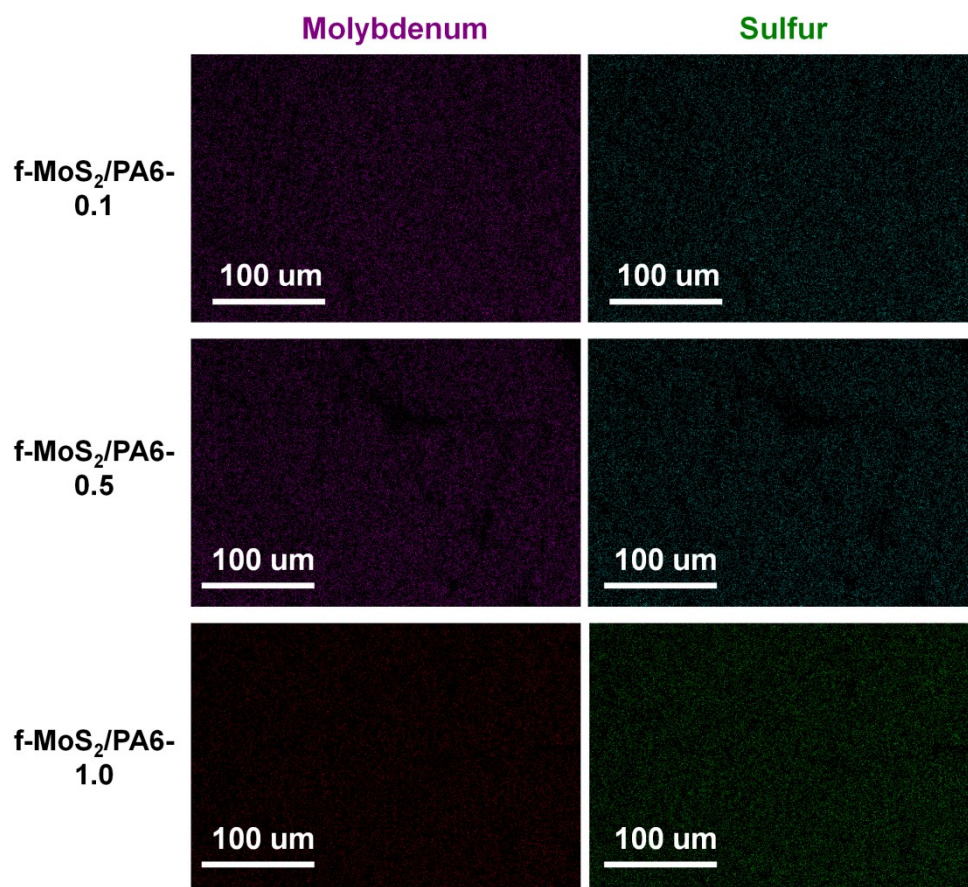

**Fig. S3.** Molybdenum and sulfur element distribution mapping images of f-MoS<sub>2</sub>/PA6-0.1, f-MoS<sub>2</sub>/PA6-0.5, and f-MoS<sub>2</sub>/PA6-1.0.

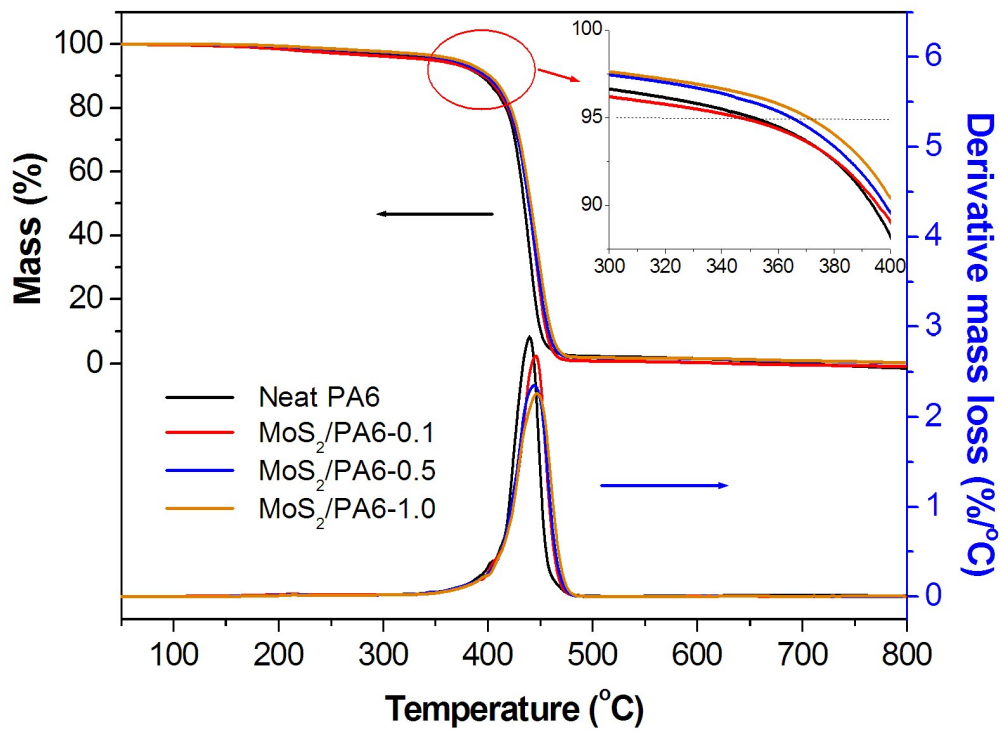

**Fig. S4.** Thermogravimetric curves of PA6 and MoS<sub>2</sub>/PA6 composites.

**Table S1** Molecular weight of PA6 and thermal properties of f-MoS<sub>2</sub>/PA6 composites

| Samples                     | [ $\eta$ ] <sup>a</sup> | M <sub><math>\eta</math></sub> <sup>b</sup> / g mol <sup>-1</sup> | T <sub>.5%</sub> <sup>c</sup> / °C | T <sub>.50%</sub> <sup>c</sup> / °C |
|-----------------------------|-------------------------|-------------------------------------------------------------------|------------------------------------|-------------------------------------|
| PA6                         | 0.71                    | 18400                                                             | 351                                | 435                                 |
| f-MoS <sub>2</sub> /PA6-0.1 | 0.66                    | 16832                                                             | 356                                | 445                                 |
| f-MoS <sub>2</sub> /PA6-0.5 | 0.59                    | 14681                                                             | 379                                | 446                                 |
| f-MoS <sub>2</sub> /PA6-1.0 | 0.45                    | 10550                                                             | 387                                | 458                                 |

<sup>a</sup> Intrinsic viscosity of free PA6 of f-MoS<sub>2</sub>/PA6 nanocomposites, which was measured at 25 °C in 85% formic acid solution by a Ubbelohde viscometer. <sup>b</sup> The viscosity-average molecular weight (M <sub>$\eta$</sub> ) was calculated according to Mark-Houwink equation,  $\eta_{in} = K[M_{\eta}]^{\alpha}$ , where  $K = 2.26 \times 10^{-4}$  and  $\alpha = 0.82$ .<sup>1</sup> <sup>c</sup> The temperature at which 5% and 50% mass loss occurred in the corresponding TGA curves.
